# Supplementary material
Source: HighWire-hosted journal article supplement (http://www.qdcxjkg.com/highwire/filestream/113463/field_highwire_adjunct_files/0/Online_supplement___Support_statement.pdf)
Supplement: Online_supplement___Support_statement.pdf [file Online_supplement___Support_statement.pdf]

## **SUPPORT STATEMENT**

This study was supported by joint grants from the CHRU Montpellier and the patient associations, APARD and ANTADIR. F. Gouzi and A. Abdellaoui were supported by a "CIFRE grant" (*Conventions Industrielles de Formation par la Recherche*) from the Fontalvie Corporation, Toulouges, France, and the French "Ministère délégué à la recherche et aux nouvelles technologies". O. Birot was supported by a grant from the Natural Sciences and Engineering Research Council of Canada (NSERC DG 341258-2011).
